# Supplementary material
Source: ML conference proceedings conference paper supplement (https://proceedings.neurips.cc/paper_files/paper/2019/hash/810dfbbebb17302018ae903e9cb7a483-Abstract.html)
Supplement: Supplementary file [file 810dfbbebb17302018ae903e9cb7a483-Supplemental.zip]

## A Missing details in Section 4

### A.1 Proof of Theorem 4.2

*Proof.* Consider the case that  $\Gamma = 1$  in which all  $\mathcal{P}_x$ s are the same. Hence, this case can be degenerated to  $l = 1$  and has an  $\varepsilon$ -coreset of size  $t$  by assumption. Divide the point set  $X$  into  $X^{(1)}, \dots, X^{(\Gamma)}$  by  $\mathcal{P}_x$ , i.e., for each  $i \in [\Gamma]$ , all collections  $\mathcal{P}_x$  ( $x \in X^{(i)}$ ) are the same, denoted by  $\mathcal{P}_i$ . For each  $i \in [\Gamma]$ , suppose  $S^{(i)}$  is an  $\varepsilon$ -coreset for the fair  $(k, z)$ -clustering problem of  $X^{(i)}$  where each point in  $S^{(i)}$  belongs to all groups in  $\mathcal{P}_i$ . Let  $S := \bigcup_{i \in [\Gamma]} S^{(i)}$ . It is sufficient to prove  $S$  is an  $\varepsilon$ -coreset for the fair  $(k, z)$ -clustering problem of  $X$ .

Given a  $k$ -subset  $C \subseteq \mathbb{R}^d$  and an assignment constraint  $F$ , let  $C_1^*, \dots, C_k^*$  be the optimal fair clustering of the instance  $(X, F, C)$ . Then for each collection  $X^{(i)}$  ( $i \in [\Gamma]$ ), we construct an assignment constraint  $F^{(i)} \in \mathcal{Z}^{k \times l}$  as follows: for each  $j_1 \in [k]$  and  $j_2 \in [l]$ , let  $F_{j_1, j_2}^{(i)} = 0$  if  $j_2 \notin \mathcal{P}_i$  and  $|C_{j_1}^* \cap X^{(i)}|$  if  $j_2 \in \mathcal{P}_i$ , i.e.,  $F_{j_1, j_2}^{(i)}$  is the number of points within  $X^{(i)}$  that belong to  $C_{j_1}^* \cap P_{j_2}$ . By definition, we have that for each  $j_1 \in [k]$  and  $j_2 \in [l]$ ,

$$F_{j_1, j_2} = \sum_{i \in [\Gamma]} F_{j_1, j_2}^{(i)}. \quad (1)$$

Then

$$\begin{aligned} \mathcal{K}_z(X, F, C) &= \sum_{i \in [\Gamma]} \mathcal{K}_z(X^{(i)}, F^{(i)}, C) && (\text{Defns. of } \mathcal{K}_z \text{ and } F^{(i)}) \\ &\geq (1 - \varepsilon) \cdot \sum_{i \in [\Gamma]} \mathcal{K}_z(S^{(i)}, F^{(i)}, C) && (\text{Defn. of } S^{(i)}) \\ &\geq (1 - \varepsilon) \cdot \mathcal{K}_z(S, F, C) && (\text{Optimality and Eq. (1)}). \end{aligned}$$

Similarly, we can prove that  $\mathcal{K}_z(S, F, C) \geq (1 - \varepsilon) \mathcal{K}_z(X, F, C)$ . It completes the proof.  $\square$

### A.2 Proof of Claim 4.1

*Proof.* We first prove the following fact for preparation.

**Fact A.1.** Suppose  $p, q \in \mathbb{R}^d$ . Define  $f : \mathbb{R} \rightarrow \mathbb{R}$  as  $f(x) := d(x, p) - d(x, q)$  (here we abuse the notation by treating  $x$  as a point in the  $x$ -axis of  $\mathbb{R}^d$ ). Then  $f$  is either ID or DI.<sup>3</sup>

*Proof.* Let  $h_p$  and  $h_q$  be the distance from  $p$  and  $q$  to the  $x$ -axis respectively, and let  $u_p$  and  $u_q$  be the corresponding  $x$ -coordinate of  $p$  and  $q$ . We have

$$f(x) = \sqrt{(x - u_p)^2 + h_p^2} - \sqrt{(x - u_q)^2 + h_q^2}.$$

Then we can regard  $p, q$  as two points in  $\mathbb{R}^2$  by letting  $p = (u_p, h_p)$  and  $q = (u_q, h_q)$ . Also we have

$$f'(x) = \frac{x - u_p}{\sqrt{(x - u_p)^2 + h_p^2}} - \frac{x - u_q}{\sqrt{(x - u_q)^2 + h_q^2}} = \frac{x - u_p}{d(x, p)} - \frac{x - u_q}{d(x, q)}.$$

W.l.o.g. assume that  $u_p \leq u_q$ . Next, we rewrite  $f'(x)$  with respect to  $\cos(\angle pxu_p)$  and  $\cos(\angle qxu_q)$ .

$$1. \text{ If } x \leq u_p. \text{ Then } f'(x) = \frac{d(x, u_q)}{d(x, q)} - \frac{d(x, u_p)}{d(x, p)} = \cos(\angle qxu_q) - \cos(\angle pxu_p).$$

$$2. \text{ If } u_p < x \leq u_q. \text{ Then } f'(x) = \frac{d(x, u_p)}{d(x, p)} + \frac{d(x, u_q)}{d(x, q)} = \cos(\angle pxu_p) + \cos(\angle qxu_q).$$

$$3. \text{ If } x > u_q. \text{ Then } f'(x) = \frac{d(x, u_p)}{d(x, p)} - \frac{d(x, u_q)}{d(x, q)} = \cos(\angle pxu_p) - \cos(\angle qxu_q).$$

<sup>3</sup>ID means that the function  $f$  first (non-strictly) increases and then (non-strictly) decreases. DI means the other way round.

Denote the intersecting point of line  $pq$  and the  $x$ -axis to be  $y$ . Specifically, if  $h_p = h_q$ , we denote  $y = -\infty$ . Note that  $f'(x) = 0$  if and only if  $x = y$ . Now we analyze  $f'(x)$  in two cases (whether or not  $h_p \leq h_q$ ).

- Case i):  $h_p \leq h_q$  which implies that  $y < u_p$ . When  $x$  goes from  $-\infty$  to  $u_p$ , first  $f'(x) \leq 0$  and then  $f'(x) \geq 0$ . When  $x > u_p$ ,  $f'(x) \geq 0$ .
- Case ii):  $h_p > h_q$  which implies that  $y > u_q$ . When  $x \leq u_q$ ,  $f'(x) \geq 0$ . When  $x$  goes from  $u_q$  to  $+\infty$ , first  $f'(x) \geq 0$  and then  $f'(x) \leq 0$ .

Therefore,  $f(x)$  is either DI or ID.  $\square$

Suppose for the contrary that for any  $i \in [k]$ ,  $C_i^*$  consists of at least two contiguous intervals. Pick any  $i$  and suppose  $S_L, S_R \subseteq C_i^*$  are two contiguous intervals such that  $S_L$  lies on the left of  $S_R$ . Let  $y_L$  denote the rightmost point of  $S_L$  and  $y_R$  denote the leftmost point of  $S_R$ . Since  $S_L$  and  $S_R$  are two distinct contiguous intervals, there exists some point  $y \in X$  between  $y_L$  and  $y_R$  such that  $y \in C_j^*$  for some  $j \neq i$ . Define  $g : \mathbb{R} \rightarrow \mathbb{R}$  as  $g(x) := d(x, c_j) - d(x, c_i)$ . By Fact A.1, we know that  $g(x)$  is either ID or DI.

If  $g$  is ID, we swap the assignment of  $y$  and  $y_{\min} := \arg \min_{x \in \{y_L, y_R\}} g(x)$  in the optimal fair  $k$ -median clustering. Since  $g$  is ID, for any interval  $P$  with endpoints  $p$  and  $q$ ,  $\min_{x \in P} g(x) = \min_{x \in \{p, q\}} g(x)$ . This fact together with  $y_L \leq y \leq y_R$  implies that  $g(y_{\min}) - g(y) \leq 0$ . Hence, the change of the objective is

$$d(y, c_i) - d(y, c_j) - d(y_{\min}, c_i) + d(y_{\min}, c_j) = g(y_{\min}) - g(y) \leq 0.$$

This contradicts with the optimality of  $C^*$  and hence  $g$  has to be DI.

Next, we show that there is no  $y' \in C_j^*$  such that  $y' < y_L$  or  $y' > y_R$ . We prove by contradiction and only focus on the case of  $y' < y_L$ , since the case of  $z > y_R$  can be proved similarly by symmetry. We swap the assignment of  $y_L$  and  $y_{\max} := \arg \max_{x \in \{y, y'\}} g(x)$  in the optimal fair  $k$ -median clustering. The change of the objective is

$$\begin{aligned} & d(y_L, c_j) - d(y_L, c_i) - d(y_{\max}, c_j) + d(y_{\max}, c_i) \\ &= g(y_L) - g(y_{\max}) \leq 0, \end{aligned}$$

where the last inequality is by the fact that  $g$  is DI. This contradicts the optimality of  $C^*$ . Hence, we conclude such  $y'$  does not exist.

Therefore,  $\forall x \in C_j^*$ ,  $y_L < x < y_R$ . By assumption,  $C_j^*$  consists of at least two contiguous intervals within  $(y_L, y_R)$ . However, we can actually do exactly the same argument for  $C_j^*$  as in the  $i$  case, and eventually we would find a  $j'$  such that  $C_{j'}^*$  lies inside a strict smaller interval  $(y'_L, y'_R)$  of  $X$ , where  $y_L < y'_L < y'_R < y_R$ . Since  $n$  is finite, we cannot do this procedure infinitely, which is a contradiction. This finishes the proof of Claim 4.1.  $\square$

### A.3 Details of Section 4.2

For completeness, we describe the detailed procedure for coresets for fair  $k$ -median.

1. We start with computing an approximate  $k$ -subset  $C^* = \{c_1, \dots, c_k\} \subseteq \mathbb{R}^d$  such that  $\text{OPT} \leq \mathcal{K}_2(X, C^*) \leq c \cdot \text{OPT}$  for some constant  $c > 1$ .<sup>4</sup>
2. Then we partition the point set  $X$  into sets  $X_1, \dots, X_k$  satisfying that  $X_i$  is the collection of points closest to  $c_i$ .
3. For each center  $c_i$ , we take a unit sphere centered at  $c_i$  and construct an  $\frac{\varepsilon}{3c}$ -net  $N_{c_i}$ <sup>5</sup> on this sphere. By Lemma 2.6 in [25],  $|N_{c_i}| = O(\varepsilon^{-d+1})$  and may be computed in  $O(\varepsilon^{-d+1})$  time. Then for every  $p \in N_{c_i}$ , we emit a ray from  $c_i$  to  $p$ . Overall, there are at most  $O(k\varepsilon^{-d+1})$  lines.

<sup>4</sup>For example, we can set  $c = 10$  by [29].

<sup>5</sup>An  $\varepsilon$ -net  $Q$  means that for any point  $p$  in the unit sphere, there exists a point  $q \in Q$  satisfying that  $d(p, q) \leq \varepsilon$ .

502 4. For each  $i \in [k]$ , we project all points of  $X_i$  onto the closest line around  $c_i$ . Let  $\pi : X \rightarrow \mathbb{R}^d$   
503 denote the projection function. By the definition of  $\frac{\varepsilon}{3c}$ -net, we have that  $\sum_{x \in X} d(x, \pi(x)) \leq$   
504  $\varepsilon \cdot \text{OPT}/3$  which indicates that the projection cost is negligible. Then for each line, we  
505 compute an  $\varepsilon/3$ -coreset of size  $O(k\varepsilon^{-1})$  for fair  $k$ -median by Theorem 4.3. Let  $S$  denote  
506 the combination of coresets generated from all lines.

## 507 B Full version of Section 5

508 In this section, we provide the details of coreset construction for fair  $k$ -means clustering. Recall that  
509 the main theorem is as follows.

510 **Theorem B.1 (Coreset for fair  $k$ -means).** *There exists an algorithm that constructs  $\varepsilon$ -coreset for*  
511 *the fair  $k$ -means problem of size  $O(\Gamma k^3 \varepsilon^{-d-1})$ , in  $O(k^2 \varepsilon^{-d+1} n + T_2(n, d, k))$  time.*

512 Note that the above result improves the coreset size of [36] by a  $O(\frac{\log n}{\varepsilon k^2})$  factor. Similar to the fair  
513  $k$ -median case, it suffices to prove for the case  $l = 1$ . Recall that an assignment constraint for  $l = 1$   
514 can be described by a vector  $F \in \mathbb{R}^k$ . Denote  $\text{OPT}$  to be the optimal  $k$ -means value without any  
515 assignment constraint.

### 516 B.1 The line case

517 Similar to [25], we first consider the case that  $X$  is a point set on the real line. For a weighted point  
518 set  $S$  with weight  $w : S \rightarrow \mathbb{R}_{\geq 0}$ , we denote the *mean* of  $S$  by  $\bar{S} := \frac{1}{|S|} \sum_{p \in S} w(p) \cdot p$ , and the *error*  
519 of  $S$  by  $\Delta(S) := \sum_{p \in S} w(p) \cdot d^2(p, \bar{S})$ .

520 **Construction.** Same to [25], we consider the points from left to right and group them into batches  
521 in a greedy way: each batch  $B$  is a maximal point set satisfying that  $\Delta(B) \leq \xi$  where  $\xi = \frac{\varepsilon^2 \text{OPT}}{200k^2}$ .  
522 Let  $\mathcal{I}(B)$  denote the smallest closed segment containing all the points of a batch  $B$ . Let  $\mathcal{B}(X)$  denote  
523 the collection of all batches. For each batch  $B$ , we construct a collection  $\mathcal{J}(B)$  of two weighted  
524 points satisfying Lemma 5.1. The coreset is defined by  $S = \bigcup_{B \in \mathcal{B}(X)} \mathcal{J}(B)$ .

525 **Lemma B.1 (Lemmas 3.2 and 3.4 in [25]).** *The number of batches is  $O(k^2/\varepsilon^2)$ . For each batch  $B$ ,*  
526 *there exist two weighted points  $q_1, q_2 \in \mathcal{I}(B)$  together with weight  $w_1, w_2$  satisfying that*

- 527 •  $w_1 + w_2 = |B|$ .
- 528 • Let  $\mathcal{J}(B)$  denote the collection of two weighted points  $q_1$  and  $q_2$ . Then we have  $\overline{\mathcal{J}(B)} = \bar{B}$   
529 and  $\Delta(B) = \Delta(\mathcal{J}(B))$ .
- 530 • Given any point  $q \in \mathbb{R}^d$ , we have

$$\mathcal{K}_2(B, q) = \Delta(B) + |B| \cdot d^2(q, \bar{B}) = \mathcal{K}_2(\mathcal{J}(B), q).$$

531 **Analysis.** We argue that  $S$  is indeed an  $\varepsilon/3$ -coreset for the fair  $k$ -means clustering problem. By  
532 Theorem 3.5 in [25],  $S$  is an  $\varepsilon/3$ -coreset for  $k$ -means clustering of  $X$ . However, we need to handle  
533 additional assignment constraints. To address this, we introduce the following lemma showing that  
534 every optimal cluster satisfying the given assignment constraint is within a contiguous interval.

535 **Lemma B.2 (Clusters are contiguous for fair  $k$ -means).** *Suppose  $X = \{x_1, \dots, x_n\}$  where  $x_1 \leq$   
536  $x_2 \leq \dots \leq x_n$ . Given an assignment constraint  $F \in \mathbb{R}^k$  and a  $k$ -subset  $C = \{c_1, \dots, c_k\} \subseteq \mathbb{R}^d$ .  
537 Then letting  $C_i := \{x_{1+\sum_{j<i} F_j}, \dots, x_{\sum_{j \leq i} F_j}\}$  ( $i \in [k]$ ), we have*

$$\mathcal{K}_2(X, F, C) = \sum_{i \in [k]} \sum_{x \in C_i} d^2(x, c_i).$$

538 *Proof.* Let  $c'_i$  denote the projection of point  $c_i$  to the real line and assume that  $c'_1 \leq c'_2 \leq \dots \leq c'_k$ . We  
539 slightly abuse the notation by regarding point  $c'_i$  as a real value. We prove the lemma by contradiction.  
540 Let  $C_1, \dots, C_k$  be the optimal fair clustering. By contradiction we assume that there exists  $i_1 < i_2$   
541 and  $j_1 < j_2$  such that  $x_{j_1} \in C_{i_2}$  and  $x_{j_2} \in C_{i_1}$ . By the definitions of  $c'_{i_1}$  and  $c'_{i_2}$ , we have that

$$d(c'_{i_1}, x_{j_1}) + d(c'_{i_2}, x_{j_2}) \leq d(c'_{i_1}, x_{j_2}) + d(c'_{i_2}, x_{j_1}), \quad (2)$$

542 and

$$\max \{d(c'_{i_1}, x_{j_1}), d(c'_{i_2}, x_{j_2})\} \leq \max \{d(c'_{i_1}, x_{j_2}), d(c'_{i_2}, x_{j_1})\}. \quad (3)$$

543 Combining Inequalities (2) and (3), we argue that

$$d^2(c'_{i_1}, x_{j_1}) + d^2(c'_{i_2}, x_{j_2}) \leq d^2(c'_{i_1}, x_{j_2}) + d^2(c'_{i_2}, x_{j_1}) \quad (4)$$

544 by proving the following claim.

545 **Claim B.1.** Suppose  $a, b, c, d \geq 0$ ,  $a + b \leq c + d$  and  $a, b, c \leq d$ . Then  $a^2 + b^2 \leq c^2 + d^2$ .

546 *Proof.* If  $a + b \leq d$ , then we have  $a^2 + b^2 \leq (a + b)^2 \leq d^2 \leq c^2 + d^2$ . So we assume that  $a + b > d$ .  
 547 Let  $e = a + b - d > 0$ . Since  $a + b \leq c + d$ , we have  $e^2 \leq c^2$ . Hence, it suffices to prove that  
 548  $a^2 + b^2 \leq e^2 + d^2$ . Note that

$$e^2 + d^2 = (a + b - d)^2 + d^2 = a^2 + b^2 + (d - a)(d - b) \geq a^2 + b^2,$$

549 which completes the proof.  $\square$

550 Now we come back to prove Lemma B.1. We have the following inequality.

$$\begin{aligned} & d^2(x_{j_1}, c_{i_1}) + d^2(x_{j_2}, c_{i_2}) \\ &= d^2(x_{j_1}, c'_{i_1}) + d^2(c'_{i_1}, c_{i_1}) + d^2(x_{j_2}, c'_{i_2}) + d^2(c'_{i_2}, c_{i_2}) \quad (\text{The Pythagorean theorem}) \\ &\leq d^2(x_{j_1}, c'_{i_2}) + d^2(c'_{i_1}, c_{i_1}) + d^2(x_{j_2}, c'_{i_1}) + d^2(c'_{i_2}, c_{i_2}) \quad (\text{Ineq. (4)}) \\ &= d^2(x_{j_1}, c_{i_2}) + d^2(x_{j_2}, c_{i_1}). \quad (\text{The Pythagorean theorem}) \end{aligned}$$

551 It contradicts with the assumption that  $x_{j_1} \in C_{i_2}$  and  $x_{j_2} \in C_{i_1}$ . Hence, we complete the proof.  $\square$

552 Now we are ready to give the following theorem.

553 **Theorem B.2 (Coreset for fair  $k$ -means when  $X$  lies on a line).** Let  $X$  be a set of  $n$  points lying  
 554 on a line in  $\mathbb{R}^d$ . Let  $S = \bigcup_{B \in \mathcal{B}(X)} \mathcal{J}(B)$  be the coreset constructed as in Lemma B.1. Then  $S$  is an  
 555  $\varepsilon/3$ -coreset for fair  $k$ -means clustering of  $X$ .

556 *Proof.* The proof is similar to that of Theorem 3.5 in [25]. The running time analysis is exactly the  
 557 same. Hence, we only focus on the correctness analysis in the following. We first rotate space such  
 558 that the line is on the  $x$ -axis and assume that  $x_1 \leq x_2 \leq \dots \leq x_n$ . Given an assignment constraint  
 559  $F \in \mathbb{R}^k$  and a  $k$ -subset  $C = \{c_1, \dots, c_k\} \subseteq \mathbb{R}^d$ , let  $c'_i$  denote the projection of point  $c_i$  to the real  
 560 line and assume that  $c'_1 \leq c'_2 \leq \dots \leq c'_k$ . Our goal is to prove that

$$|\mathcal{K}_2(S, F, C) - \mathcal{K}_2(X, F, C)| \leq \frac{\varepsilon}{3} \cdot \mathcal{K}_2(X, F, C).$$

561 By Lemma B.2, we have that the optimal fair clustering of  $X$  should be  $C_i :=$   
 562  $\{x_{1+\sum_{j < i} F_j}, \dots, x_{\sum_{j \leq i} F_j}\}$  for each  $i \in [k]$ . Hence,  $\mathcal{I}(C_1), \dots, \mathcal{I}(C_k)$  are disjoint intervals.  
 563 Similarly, the optimal fair clustering of  $X$  should be to scan weighted points in  $S$  from left to right  
 564 and cluster points of total weight  $F_i$  to  $c_i$ .<sup>6</sup> If a batch  $B \in \mathcal{B}(X)$  lies completely within some  
 565 interval  $\mathcal{I}(C_i)$ , then it does not contribute to the overall difference  $|\mathcal{K}_2(S, F, C) - \mathcal{K}_2(X, F, C)|$  by  
 566 Lemma B.1.

567 Thus, the only problematic batches are those that contain an endpoint of  $\mathcal{I}(C_1), \dots, \mathcal{I}(C_k)$ . There  
 568 are at most  $k - 1$  such batches. Let  $B$  be one such batch and  $\mathcal{J}(B) = \{q_1, q_2\}$  be constructed as in  
 569 Lemma B.1. For  $i \in [k]$ , let  $V_i := \mathcal{I}(C_i) \cap B$ . Let  $T$  denote the collection of the  $w_1$  left side points  
 570 within  $B$  and  $T' = B \setminus T$ . Note that  $w_1$  may be fractional and hence  $T$  may include a fractional  
 571 point. Denote

$$\eta := \sum_{i \in [k]} \sum_{x \in V_i \cap T} d^2(x, q_1) + \sum_{i \in [k]} \sum_{x \in V_i \cap T'} d^2(x, q_2).$$

<sup>6</sup>Recall that a weighted point can be partially assigned to more than one cluster.

572 We have that

$$\begin{aligned}
\eta &= \sum_{i \in [k]} \sum_{x \in V_i \cap T} (d(x, \bar{B}) - d(q_1, \bar{B}))^2 + \sum_{i \in [k]} \sum_{x \in V_i \cap T'} (d(x, \bar{B}) - d(q_2, \bar{B}))^2 \\
&\leq \sum_{i \in [k]} \sum_{x \in V_i \cap T} (d^2(x, \bar{B}) + d^2(q_1, \bar{B})) + \sum_{i \in [k]} \sum_{x \in V_i \cap T'} (d^2(x, \bar{B}) + d^2(q_2, \bar{B})) \\
&= \Delta(B) + \Delta(\mathcal{J}(B)) = 2\Delta(B) \quad (\text{Lemma B.1}) \\
&\leq \frac{\varepsilon^2 \text{OPT}}{100k} \quad (\text{Construction of } B).
\end{aligned} \tag{5}$$

573 Then we can upper bound the contribution of  $B$  to the overall difference  $|\mathcal{K}_2(S, F, C) - \mathcal{K}_2(X, F, C)|$   
574 by

$$\begin{aligned}
&\left| \sum_{i \in [k]} \sum_{x \in V_i \cap T} (d^2(x, c_i) - d^2(q_1, c_i)) + \sum_{i \in [k]} \sum_{x \in V_i \cap T'} (d^2(x, c_i) - d^2(q_2, c_i)) \right| \\
&\leq \sum_{i \in [k]} \sum_{x \in V_i \cap T} |d^2(x, c_i) - d^2(q_1, c_i)| + \sum_{i \in [k]} \sum_{x \in V_i \cap T'} |d^2(x, c_i) - d^2(q_2, c_i)| \\
&= \sum_{i \in [k]} \sum_{x \in V_i \cap T} d(x, q_1) (d(x, c_i) + d(q_1, c_i)) + \sum_{i \in [k]} \sum_{x \in V_i \cap T'} d(x, q_2) (d(x, c_i) + d(q_2, c_i)) \\
&\leq \sum_{i \in [k]} \sum_{x \in V_i \cap T} d(x, q_1) (2d(x, c_i) + d(x, q_1)) + \sum_{i \in [k]} \sum_{x \in V_i \cap T'} d(x, q_2) (2d(x, c_i) + d(x, q_2)) \\
&= \sum_{i \in [k]} \sum_{x \in V_i \cap T} d^2(x, q_1) + \sum_{i \in [k]} \sum_{x \in V_i \cap T'} d^2(x, q_2) \\
&\quad + 2 \sum_{i \in [k]} \sum_{x \in V_i \cap T} d(x, q_1) d(x, c_i) + 2 \sum_{i \in [k]} \sum_{x \in V_i \cap T'} d(x, q_2) d(x, c_i) \\
&\leq \eta + 2\sqrt{\eta} \sqrt{\sum_{i \in [k]} \sum_{x \in V_i} d^2(x, c_i)} \quad (\text{Defn. of } \eta \text{ and Cauchy-Schwarz}) \\
&\leq \frac{\varepsilon^2 \text{OPT}}{50k} + \frac{2\varepsilon}{7k} \sqrt{\text{OPT} \cdot \mathcal{K}_2(X, F, C)} \quad (\text{Ineq. (5)}) \\
&\leq \frac{\varepsilon^2 \text{OPT}}{100k} + \frac{2\varepsilon}{10k} \cdot \frac{\text{OPT} + \sum_{i \in [k]} \sum_{x \in V_i} d^2(x, c_i)}{2} \\
&\leq \frac{\varepsilon \text{OPT}}{5k} + \frac{\varepsilon \sum_{i \in [k]} \sum_{x \in V_i} d^2(x, c_i)}{10k}.
\end{aligned} \tag{6}$$

575 Since there are at most  $k - 1$  such batches, we conclude that the their total contribution to the error  
576  $|\mathcal{K}_2(S, F, C) - \mathcal{K}_2(X, F, C)|$  can be upper bounded by

$$\frac{\varepsilon \text{OPT}}{5} + \frac{\varepsilon \mathcal{K}_2(X, F, C)}{10k} \leq \frac{\varepsilon}{3} \cdot \mathcal{K}_2(X, F, C).$$

577 It completes the proof.  $\square$

## 578 B.2 Extending to higher dimension

579 The extension is almost the same to fair  $k$ -median, except that we apply Theorem B.2 to construct the  
580 coresets on each line. Let  $S$  denote the combination of coresets generated from all lines.

581 *Proof of Theorem B.1.* By the above construction, the coreset size is  $O(k^3 \varepsilon^{-d-1})$ . For the correct-  
582 ness, Theorem 3.6 in [25] applies an important fact that for any  $k$ -subset  $C \subseteq \mathbb{R}^d$ ,

$$\mathcal{K}_2(X, C^*) \leq c \cdot \mathcal{K}_2(X, C).$$

583 In our setting, we have a similar property. Note that for any given assignment constraint  
584  $F \in \mathbb{R}^k$  and any  $k$ -subset  $C \subseteq \mathbb{R}^d$ , we have

$$\mathcal{K}_2(X, C^*) \leq c \cdot \mathcal{K}_2(X, F, C).$$

585 Then combining this fact with Theorem B.2, we have that  $S$  is an  $\varepsilon$ -coreset for the fair  $k$ -means  
 586 clustering problem, by the same argument as that of Theorem 3.6 in [25].  $\square$

### 587 B.3 Proof of Theorem 4.3

588 *Proof.* The proof idea is similar to that of Lemma 2.8 in [25]. We first rotate space such that the line  
 589 is on the  $x$ -axis and assume that  $x_1 \leq x_2 \leq \dots \leq x_n$ . Given an assignment constraint  $F \in \mathbb{R}^k$  and a  
 590  $k$ -subset  $C = \{c_1, \dots, c_k\} \subseteq \mathbb{R}^d$ , let  $c'_i$  denote the projection of point  $c_i$  to the real line and assume  
 591 that  $c'_1 \leq c'_2 \leq \dots \leq c'_k$ . Our goal is to prove that

$$|\mathcal{K}_1(S, F, C) - \mathcal{K}_1(X, F, C)| \leq \frac{\varepsilon}{3} \cdot \mathcal{K}_1(X, F, C).$$

592 By the construction of  $S$ , we build up a mapping  $\pi : X \rightarrow S$  by letting  $\pi(x) = \bar{B}$  for any  $x \in B$ .  
 593 For each  $i \in [k]$ , let  $C_i$  denote the collection of points assigned to  $c_i$  in the optimal fair  $k$ -median  
 594 clustering of  $X$ . By Lemma 4.1,  $C_1, \dots, C_k$  partition the line into at most  $2k - 1$  intervals  $\mathcal{I}_1, \dots, \mathcal{I}_t$   
 595 ( $t \leq 2k - 1$ ), such that all points of any interval  $\mathcal{I}_i$  are assigned to the same center. Denote an  
 596 assignment function  $f : X \rightarrow C$  by  $f(x) = c_i$  if  $x \in C_i$ . Let  $\hat{B}$  denote the set of all batches  $B$ ,  
 597 which intersects with more than one intervals  $\mathcal{I}_i$ , or alternatively, the interval  $\mathcal{I}(B)$  contains the  
 598 projection of a center point of  $C$  to the  $x$ -axis. Clearly,  $|\hat{B}| \leq 2k - 2 + k = 3k - 2$ . For each batch  
 599  $B \in \hat{B}$ , we have

$$\sum_{x \in B} d(\pi(x), f(x)) - d(x, f(x)) \stackrel{\text{triangle ineq.}}{\leq} \sum_{x \in B} |d(x, \pi(x))| = \sum_{x \in B} |d(x, \bar{B})| \stackrel{\text{Defn. of } B}{\leq} \frac{\varepsilon \text{OPT}}{30k}. \quad (7)$$

600 Note that  $X \setminus \bigcup_{B \in \hat{B}} B$  can be partitioned into at most  $3k - 1$  contiguous intervals. Denote these  
 601 intervals by  $\mathcal{I}'_1, \dots, \mathcal{I}'_{t'}$  ( $t' \leq 3k - 1$ ). By definition, all points of each interval  $\mathcal{I}'_i$  are assigned to the  
 602 same center whose projection is outside  $\mathcal{I}'_i$ . Then by the proof of Lemma 2.8 in [25], we have that for  
 603 each  $\mathcal{I}'_i$ ,

$$\sum_{x \in \mathcal{I}'_i} d(\pi(x), f(x)) - d(x, f(x)) \leq 2\varepsilon = \frac{\varepsilon \text{OPT}}{15k}. \quad (8)$$

604 Combining Inequalities (7) and (8), we have

$$\begin{aligned} \mathcal{K}_1(S, F, C) - \mathcal{K}_1(X, F, C) &\leq \sum_{x \in X} d(\pi(x), f(x)) - d(x, f(x)) \quad (\text{Defn. of } \mathcal{K}_1(S, F, C)) \\ &= \sum_{B \in \hat{B}} \sum_{x \in B} d(\pi(x), f(x)) - d(x, f(x)) \\ &\quad + \sum_{i \in [t]} \sum_{x \in \mathcal{I}'_i} d(\pi(x), f(x)) - d(x, f(x)) \quad (9) \\ &\leq (3k - 2) \cdot \frac{\varepsilon \text{OPT}}{30k} + (3k - 1) \cdot \frac{\varepsilon \text{OPT}}{15k} \quad (\text{Ineqs. (7) and (8)}) \\ &\leq \frac{\varepsilon \text{OPT}}{3} \leq \frac{\varepsilon}{3} \cdot \mathcal{K}_1(X, F, C). \end{aligned}$$

605 To prove the other direction, we can regard  $S$  as a collection of  $n$  unweighted points and consider the  
 606 optimal fair  $k$ -median clustering of  $S$ . Again, the optimal fair  $k$ -median clustering of  $S$  partitions  
 607 the  $x$ -axis into at most  $2k - 1$  contiguous intervals, and can be described by an assignment function  
 608  $f' : S \rightarrow C$ . Then we can build up a mapping  $\pi' : S \rightarrow X$  as the inverse function of  $\pi$ . For each  
 609 batch  $B$ , let  $S_B$  denote the collection of  $|B|$  unweighted points located at  $\bar{B}$ . We have the following  
 610 inequality that is similar to Inequality (7)

$$\sum_{x \in S_B} d(\pi'(x), f'(x)) - d(x, f'(x)) \leq \frac{\varepsilon \text{OPT}}{30k}.$$

611 Suppose a contiguous interval  $\mathcal{I}$  consists of several batches and satisfies that all points of  $\mathcal{I} \cap S$  are  
 612 assigned to the same center by  $f'$  whose projection is outside  $\mathcal{I}$ . Then by the proof of Lemma 2.8  
 613 in [25], we have that

$$\sum_{B \in \mathcal{I}} \sum_{x \in S_B} d(\pi'(x), f'(x)) - d(x, f'(x)) \leq 0.$$

614 Then by a similar argument as for Inequality (9), we can prove the other direction

$$\mathcal{K}_1(X, F, C) - \mathcal{K}_1(S, F, C) \leq \frac{\varepsilon}{3} \cdot \mathcal{K}_1(X, F, C),$$

615 which completes the proof. □
